# Supplementary material for: Synthesis, Characterization, Cyclic Voltammetry, and Biological Studies of Co(II), Ni(II), and Cu(II) Complexes of a Tridentate Schiff Base, 1-((E)-(2-Mercaptophenylimino) Methyl) Naphthalen-2-ol (H2L1)
Source: Hindawi journal article supplement (doi:10.1155/2020/5238501), 2020-11-09
Supplement: f1 [file 5238501.f1.docx]

**Synthesis, characterization, cyclic voltammetry and biological studies of Co(II), Ni(II) and Cu(II) complexes of a tridentate Schiff base, 1-((E)-(2-mercaptophenylimino) methyl)naphthalen-2-ol (H2L1)**

Maurice Kuate1,2, Mariam Conde Asseng2*, Evans Mainsah Ngandung3, Awawou G. Paboudam1, Francis Merlin M. Tchieno4,5, Kevin I.Y. Ketchemen1, Tonle Kenfack Ignas4 and Peter T. Ndifon1*

1. Department of Inorganic Chemistry, Faculty of Science, University of Yaounde I, Cameroon

2. Department of Chemistry, Faculty of Science, University of Douala, Cameroon

3. Department of Chemistry, Faculty of Science, University of Buea, Cameroon

4. Department of Chemistry, Faculty of Science, University of Dschang, Cameroon

5. Department of Chemistry, Faculty of Science, University of Maroua, Cameroon

**Corresponding Author:* [*pndifon@yahoo.com*](mailto:pndifon@yahoo.com)

**Supplementary Publication**

Supplementary information in Fig.S1 shows the IR spectrum of the ligand superimposed with thiose of the metal complexes for comparison.


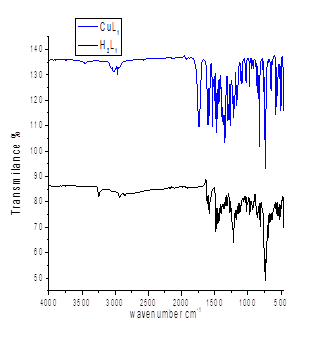

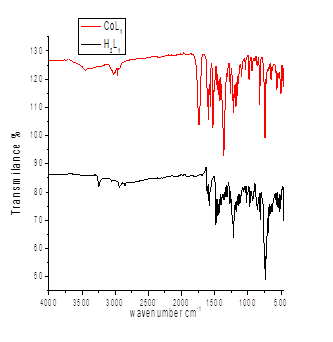

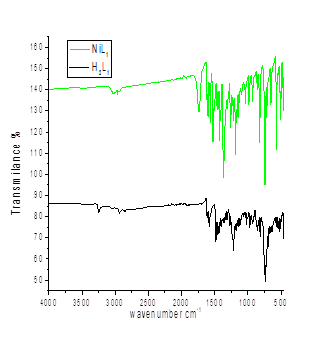


**Figure S1. Infrared spectra of ligand and its complexes**
